# Supplementary material for: Phosphate-type zwitterionic liquid
Source: Royal Society of Chemistry journal article supplement (doi:10.1039/d4cc02284j), 2024-01-01
Supplement: d4cc02284j1.pdf [file d4cc02284j1.pdf]

## Supporting information

### Phosphate-type zwitterionic liquid

Tetsuo Komori, Ayumi Hachisu, Kazuaki Ninomiya, Kenji Takahashi, Kosuke Kuroda

Synthetic scheme of  $C_1imC_2P$  (this study)

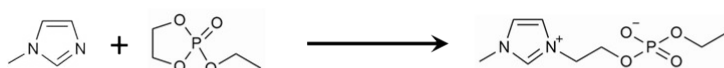

Synthetic scheme of  $C_1imC_3C$  (previous study)

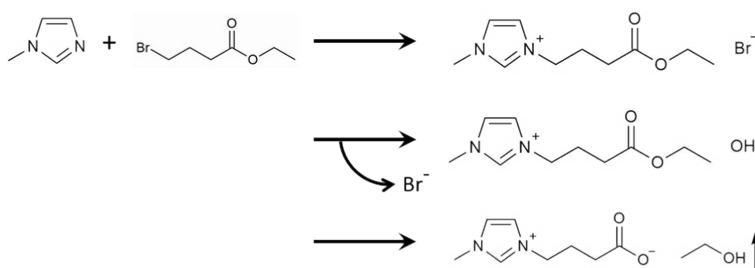

Synthetic scheme of  $OE_2imC_3C$  (previous study)

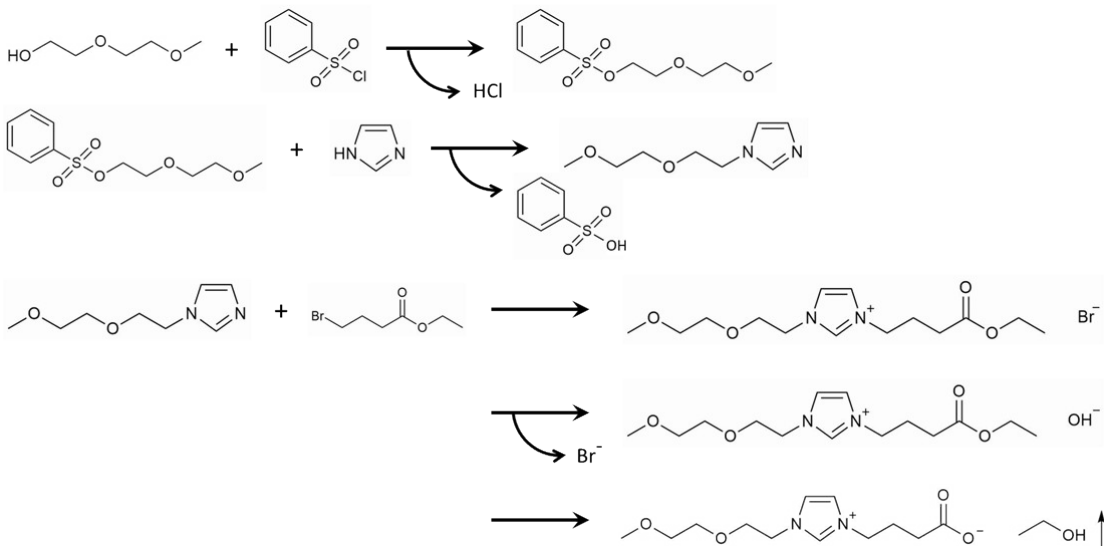

Fig. S1. Synthetic scheme of  $C_1imC_3C$  (simple synthesis, middle synthesis energy cost, high melting point, middle atom economy) and  $OE_2imC_3C$  (complicated synthesis, high synthesis energy cost, middle melting point, low atom economy), which have been developed in the previous studies.

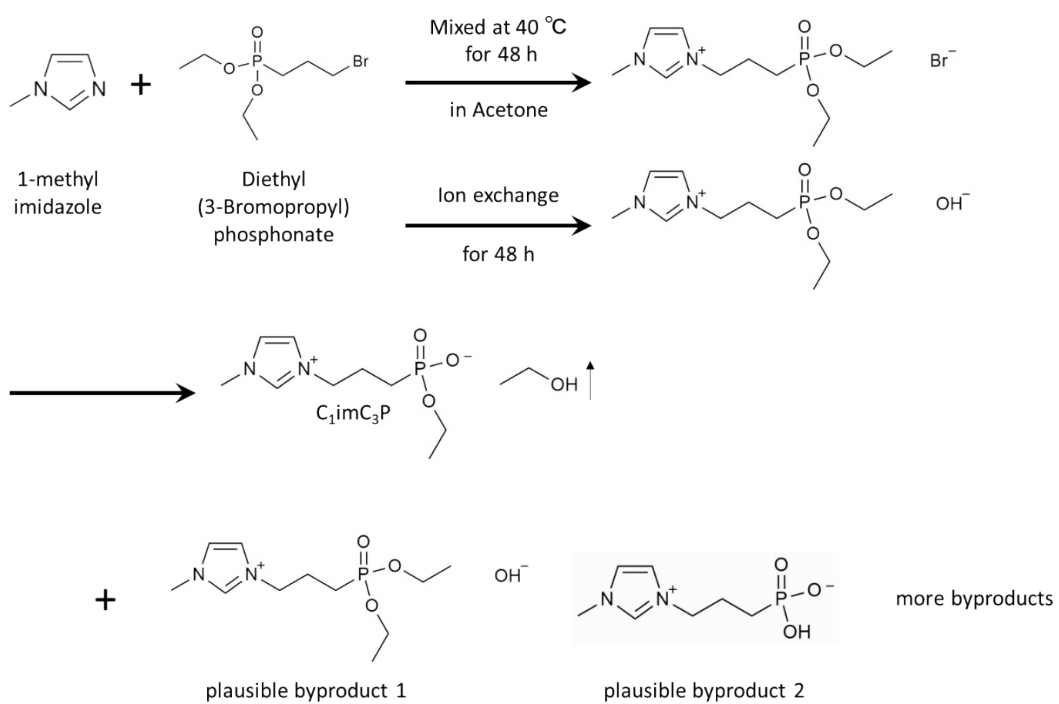

Fig. S2. Structures of the plausible byproducts.

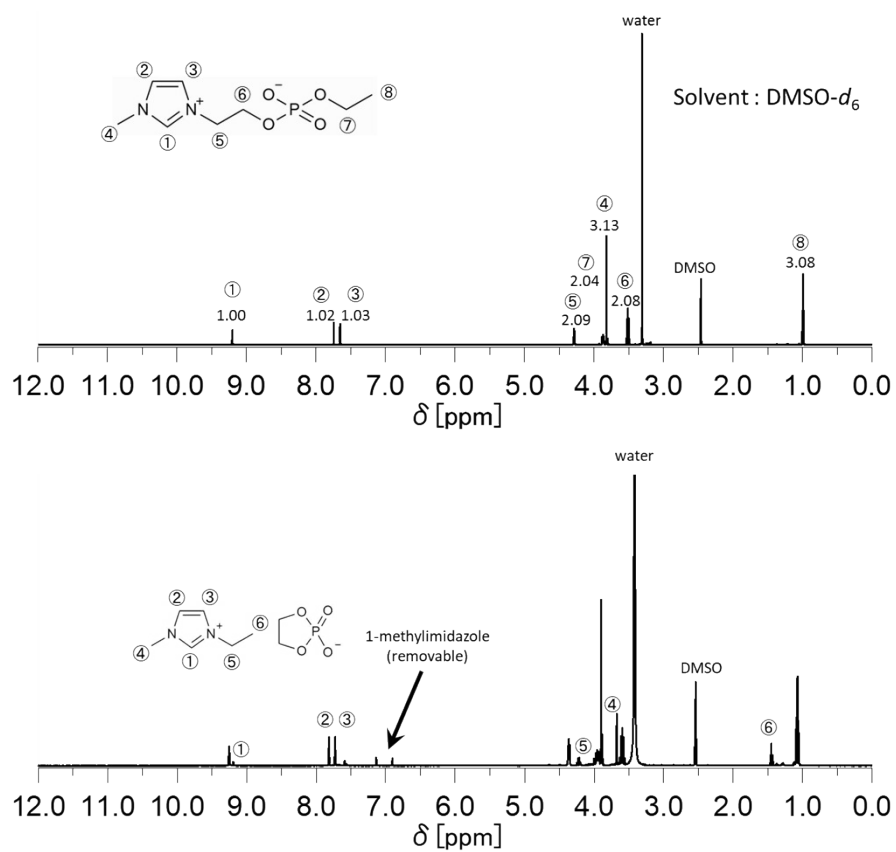

Fig. S3. Spectra of  $^1\text{H}$  NMR of  $\text{C}_1\text{imC}_2\text{C}$  and byproduct.

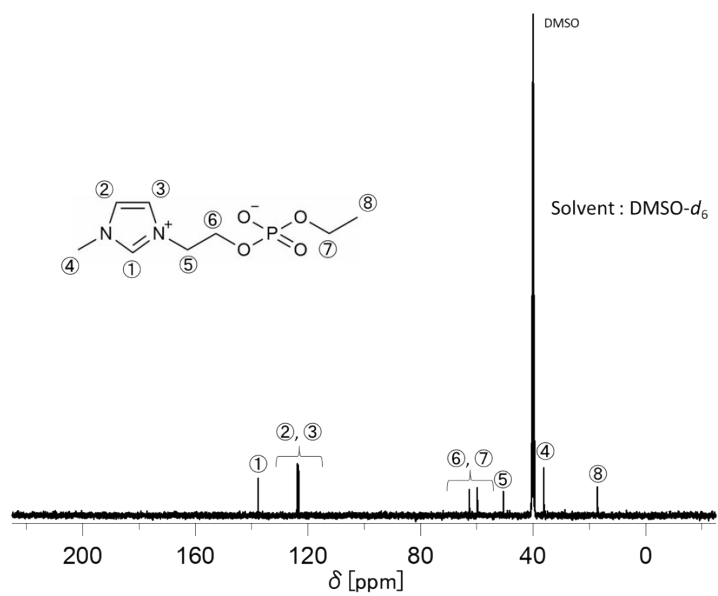

Figure S4.  $^{13}\text{C}$  NMR spectrum of  $\text{C}_1\text{imC}_2\text{P}$ .

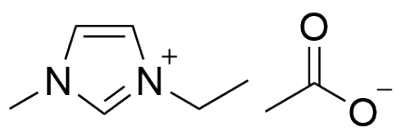

Fig. S5. Structure of [C<sub>2</sub>mim]OAc.

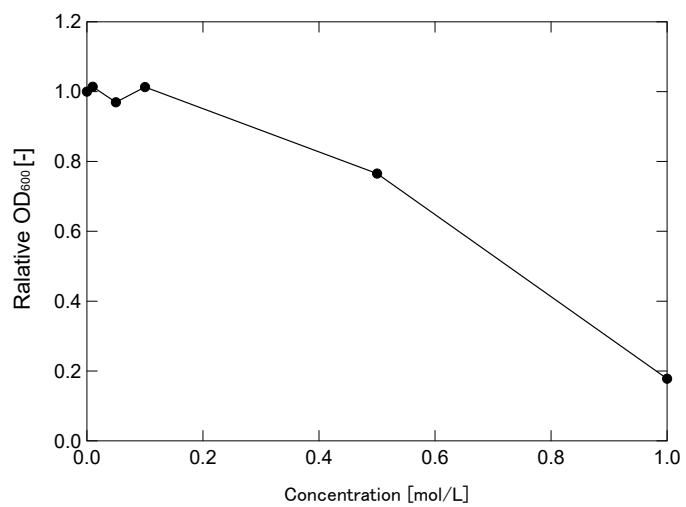

Fig. S6. Relation between relative OD<sub>600</sub> and C<sub>1</sub>imC<sub>2</sub>P concentration.

Table. S1. Various C<sub>1</sub>imC<sub>2</sub>P synthesis conditions and yields (Full version).

| Temp.<br>(°C) | Solvent            | Molar<br>ratio<br>(A:B) | Time<br>(h) | Yield<br>(%) | Byproduct |
|---------------|--------------------|-------------------------|-------------|--------------|-----------|
| 50            | THF                | 1:1                     | 48          | 15           | No        |
| 70            | THF                | 1:1                     | 48          | 16           | Yes       |
| 40            | DCM                | 1:1                     | 48          | 4            | No        |
| 50            | toluene            | 1:1                     | 48          | 5            | Yes       |
| 70            | water/<br>methanol | 1:1                     | 48          | 4            | No        |
| 55            | hexane             | 1:1                     | 18          | 58           | Yes       |
| 27            | hexane             | 1:1                     | 48          | 7            | No        |
| 27            | hexane             | 1:1                     | 300         | 25           | Yes       |
| 27            | neat               | 1:1                     | 24          | 17           | No        |
| 27            | neat               | 1:1                     | 37          | 25           | No        |
| 27            | neat               | 1:1                     | 48          | 25           | No        |
| 27            | neat               | 1:1                     | 60          | 25           | No        |
| 27            | neat               | 1:1                     | 125         | 25           | Yes       |
| 27            | neat               | 1:1                     | 150         | 25           | Yes       |
| 27            | neat               | 1:1                     | 170         | 25           | Yes       |
| 27            | neat               | 2:1                     | 24          | 23           | No        |
| 27            | neat               | 2:1                     | 48          | 33           | No        |

## Experimental

### Materials and methods

1-Methylimidazole, diethyl (3-bromopropyl) phosphonate, and 2-ethoxy-1,3,2-dioxaphospholane 2-oxide were purchased from Tokyo Chemical Industry Co. Ltd. and used as received. Toluene, acetone, methanol, hexane, diethyl ether, dimethyl sulfoxide- $d_6$  (99.9%D), and DCM were purchased from Kanto Chemical Co., Inc., and used as received. THF was purchased from Kanto Chemical Co., Inc., and used after passing through aluminium oxide (basic, Sigma-Aldrich Co., LLC). Sodium chloride, dried yeast extract, and tryptone were purchased from Nacalai Tesque Co., Inc., and used as received.

$^1\text{H}$  and  $^{13}\text{C}$  NMR spectra were measured using JEOL ECA-400 and ECZ-600R spectrometers. Thermogravimetric analysis was performed using a DTG-60AH instrument (Shimadzu Co., Ltd.), and differential scanning calorimetry was performed using a DSC-60Aplus instrument (Shimadzu Co., Ltd.).

### Typical Synthesis of $\text{C}_{11}\text{imC}_2\text{P}$

1-Methylimidazole (1.39 g, 0.017 mol) and 2-ethoxy-1,3,2-dioxaphospholane 2-oxide (2.58 g, 0.017 mol) were added. The mixture was then heated in an oil bath at 27 °C for 48 h. The mixture was then subjected to ion exchange with an ion exchange resin (Amberlite IRN-78, ion exchange resin, nuclear grade, Thermo Fisher Scientific) in a water/methanol mixture (1/1, v/v) to remove impurities. The solvent was then evaporated under reduced pressure. The mixture was then washed five times with excess diethyl ether, and residual ether was evaporated under reduced pressure.

$^1\text{H}$  NMR (400 MHz; DMSO- $d_6$ ;  $\text{Me}_4\text{-Si}$ ),  $\delta$  = 9.20 (s, 1H, NCHN), 7.75 and 7.65 (t,  $J$  = 2.4 Hz and 2.4 Hz, 2H, NCHCHN), 4.29 (t,  $J$  = 6.8 Hz, 2H, NCH<sub>2</sub>CH<sub>2</sub>O), 3.885-3.855 (q,  $J$  = 5.2 Hz and 5.6 Hz, 2H, OCH<sub>2</sub>CH<sub>3</sub>), 3.821 (s, 3H, NCH<sub>3</sub>), 3.51 (t,  $J$  = 9.6 Hz, 2H, NCH<sub>2</sub>CH<sub>2</sub>O), 1.00 (t,  $J$  = 9.2 Hz, 3H, OCH<sub>2</sub>CH<sub>3</sub>).  $^{13}\text{C}$  NMR (100 MHz; DMSO- $d_6$ ;  $\text{Me}_4\text{-Si}$ ),  $\delta$  = 137.69, 123.74, 123.32, 62.59, 59.83, 50.61, 36.17, 58.61 and 17.1.

Fast atom bombardment ionisation mass spectrometry: 233.0695  $m/z$  (observed) and 233.0686  $m/z$  (calculated) as  $[\text{M}+\text{H}]^-$ , and 235.0847  $m/z$  (observed) and 235.0842  $m/z$  (calculated) as  $[\text{M}-\text{H}]^+$ .

Elemental analysis:  $\text{C}_{11}\text{imC}_2\text{P} \cdot 1.9\text{H}_2\text{O}$  (Found: C, 35.95; H, 7.06; N, 10.17; Calculated for  $\text{C}_8\text{H}_{18.8}\text{N}_2\text{O}_{5.9}$ : C, 35.80; H, 7.06; N, 10.44%)

### Physicochemical properties and cellulose dissolution ability of zwitterion

Differential scanning calorimetry was conducted at a heating rate of +10 °C/min and a cooling rate of -10 °C/min. Thermogravimetric analysis was conducted with a heating rate of +10 °C/min.



To investigate the cellulose dissolution ability, 1 mg (1 wt%) of cellulose was added to 100 mg of C<sub>1</sub>imC<sub>2</sub>P while stirring. This process was repeated until the cellulose was not dissolved. The dissolution was confirmed visually.

#### **Rough estimation of Kamlet-Taft parameter $\beta$ value**

C<sub>1</sub>imC<sub>2</sub>P/ethanol solution of <sup>1</sup>H NMR was measured at room temperature. The difference between the chemical shifts of the ethanol-CH<sub>3</sub> and the ethanol-OH group gives the  $\delta$ OH-shift. OH-shift in the C<sub>1</sub>imC<sub>2</sub>P/ethanol solution was 4.284.

Kamlet-Taft parameter  $\beta$  was estimated by approximation curve calculated from the OH shift by referring the literature (*Dialkyl Phosphate-Related Ionic Liquids as Selective Solvents for Xylan*, reported by Carmen Froschauer, Michael Hummel, Gerhard Laus, Herwig Schottenberger, Herbert Sixta, Hedda K. Weber and Gerhard Zuckerstatter, *Macromolecules*, 2012, **13**, 1973-1980).

#### **Toxicity of zwitterions**

YPD medium was prepared with 20 g/L peptone, 20 g/L glucose and 10 g/L yeast extract and autoclaved before use. Zwitterion/YPD medium (2 mL) at concentrations of 0, 0.01, 0.05, 0.1, 0.5 and 1.0 mol/L were prepared. *Kluyveromyces marxianus* (DMKU 3-1042) was precultured aerobically at 40 °C for 28 h in a 27 mL test tube containing 6 mL of YPD medium. After preculture, *Kluyveromyces marxianus* was inoculated into zwitterion/YPD medium mixtures (100  $\mu$ L per well in a 96well plate) with an initial OD<sub>600</sub> of 0.2, measured using a microplate spectrophotometer (Bio Tek Epoch, Agilent). The inoculated cultures were aerobically incubated at 40 °C for 6 h using an orbital shaker at 700 rpm, and the OD<sub>600</sub> of the solutions was measured. The toxicity of the zwitterions was evaluated based on relative growth, which is defined as the percentage of OD<sub>600</sub> of the zwitterion/YPD medium mixtures at 6 h compared to that of the pure medium.
